# Supplementary material for: Efficacy of fibrin glue versus sutures for attaching conjunctival autografts in pterygium surgery: a systematic review with meta-analysis and trial sequential analysis of evidence
Source: PubMed Central journal article supplement (PMC5522296; doi:10.18632/oncotarget.17195), 2017-04-18
Supplement: oncotarget-08-41487-s001.pdf [file oncotarget-08-41487-s001.pdf]

# Efficacy of fibrin glue versus sutures for attaching conjunctival autografts in pterygium surgery: a systematic review with meta-analysis and trial sequential analysis of evidence

## Supplementary Materials

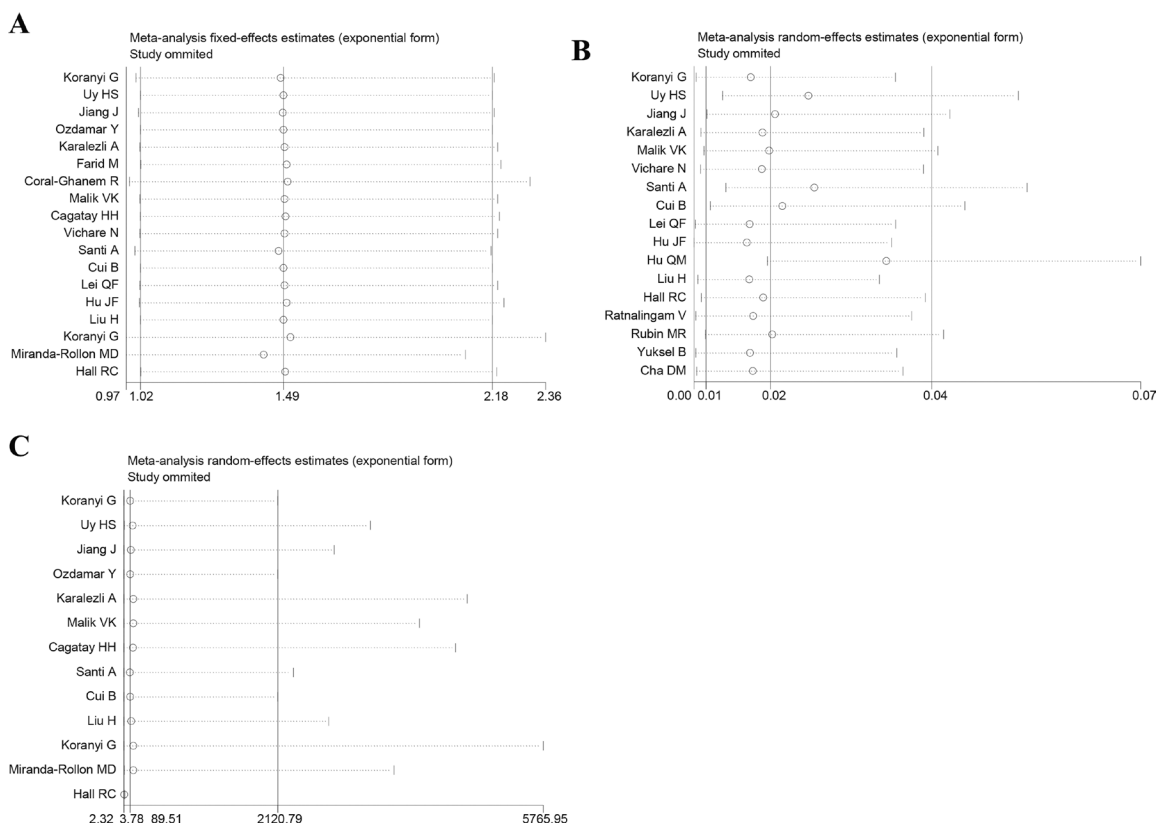

**Supplementary Figure 1:** (A) The sensitivity analysis in the recurrence rate group. (B) The sensitivity analysis in the surgical duration group. (C) The sensitivity analysis in the complication rate group.

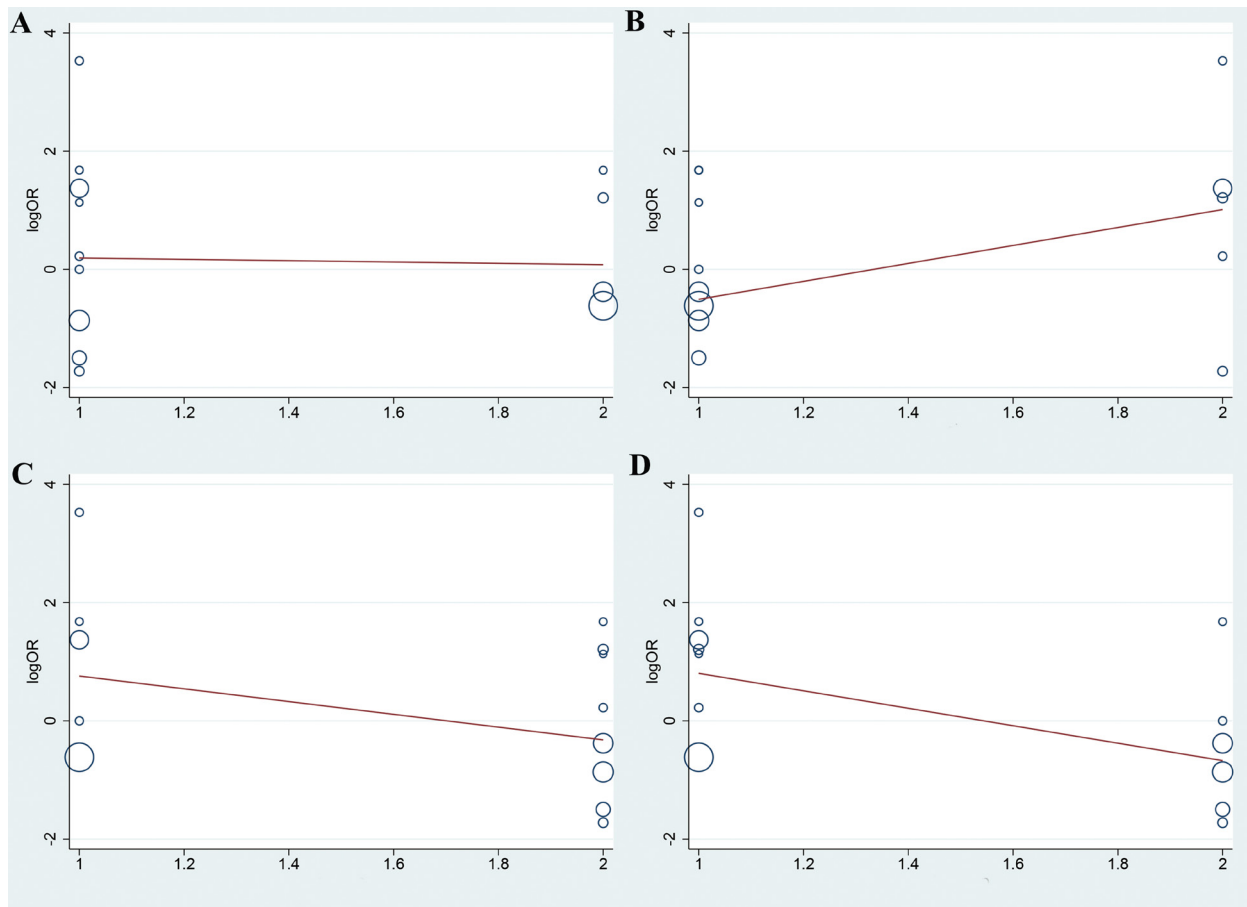

**Supplementary Figure 2: Meta-regression in the recurrence rate group.** (A) region, (B) sample size, (C) suture material, (D) follow up duration.

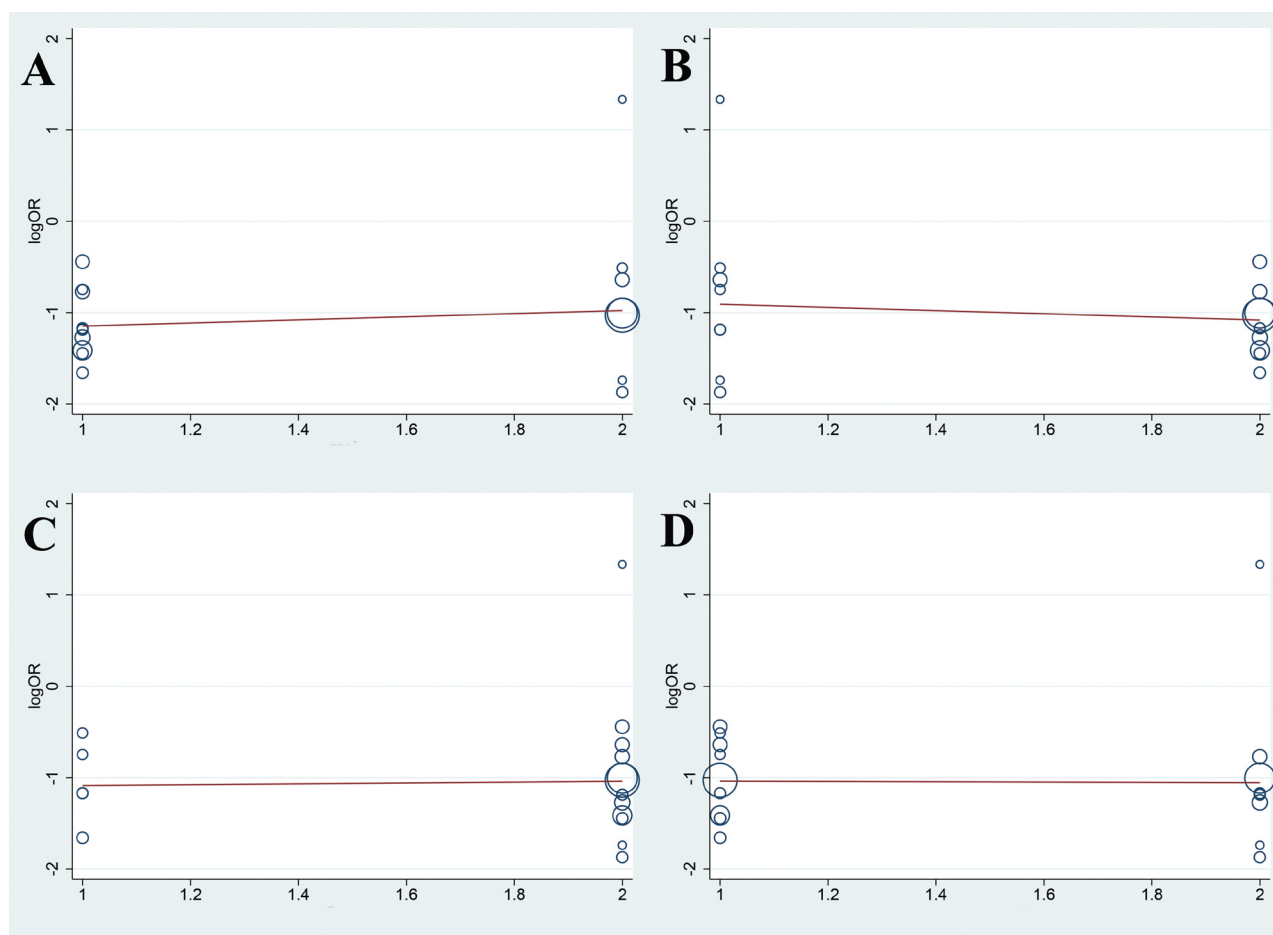

**Supplementary Figure 3: Meta-regression in the complication rate group.** (A) region, (B) sample size, (C) suture material, (D) follow up duration.

**Supplementary Table 1: Results of meta-regression analyses**

|                 | recurrence rate group |               | complication rate group |                |
|-----------------|-----------------------|---------------|-------------------------|----------------|
|                 | <i>P</i> value        | 95% CI        | <i>P</i> value          | 95% CI         |
| Region          | 0.671                 | (0.514–2.73)  | 0.895                   | (0.142–5.619)  |
| Sample size     | 0.727                 | (0.301–2.353) | 0.035                   | (1.140–18.296) |
| Suture material | 0.937                 | (0.309–3.549) | 0.182                   | (0.639–1.803)  |
| Follow-up       | 0.967                 | (0.429–2.252) | 0.057                   | (0.497–1.050)  |
